# Supplementary material for: Superior Stability of Hydroxysafflor Yellow A in Xuebijing Injection and the Associated Mechanism
Source: MDPI journal article supplement (doi:10.3390/molecules22122129), 2017-12-02
Supplement: s1 [file s1]

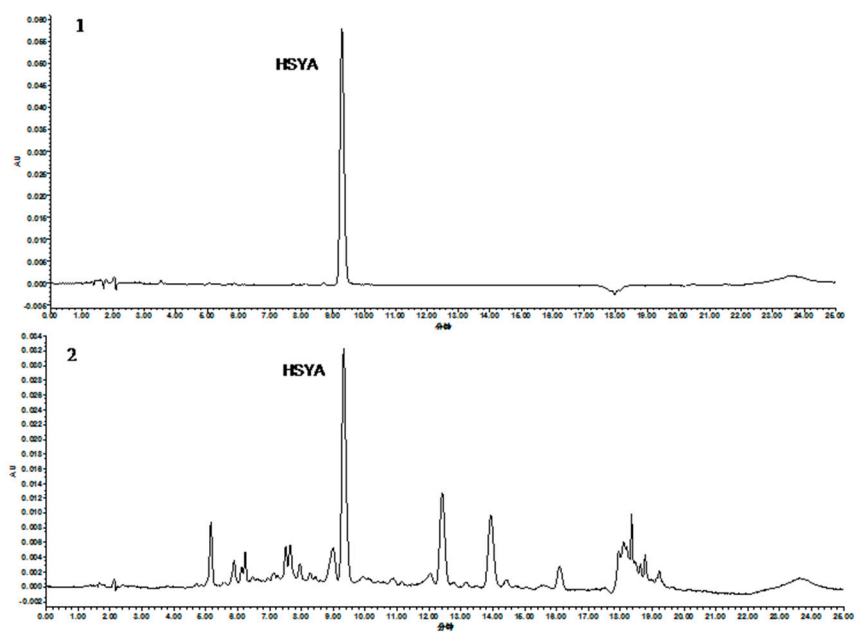

Figure S1 HPLC chromatogram of HSYA standard (1) and XBJ injection (2)

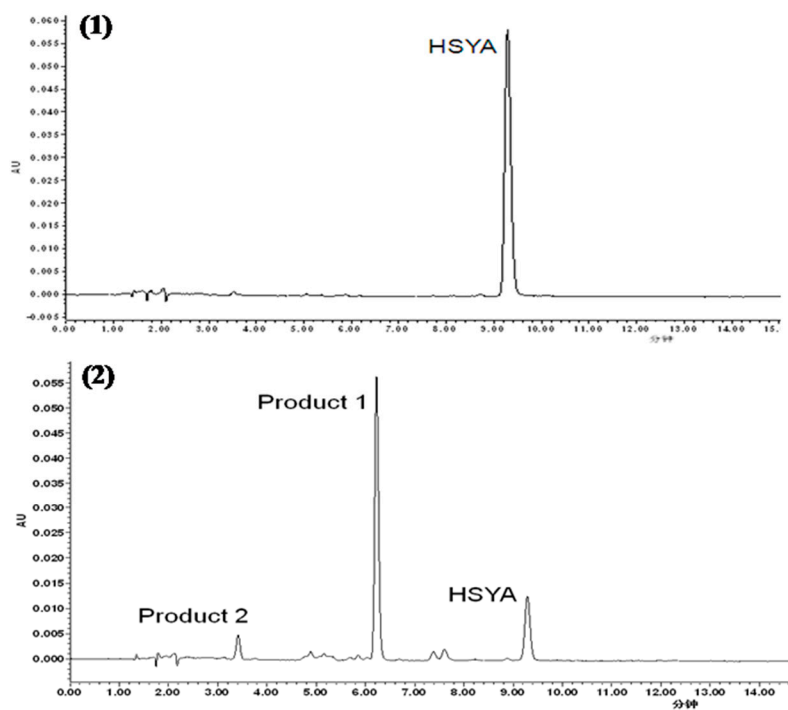

Figure S2. HPLC chromatogram of HSYA standard (time = 0) (1) and HSYA in buffer solution of pH 9.16 after 7 h (2)

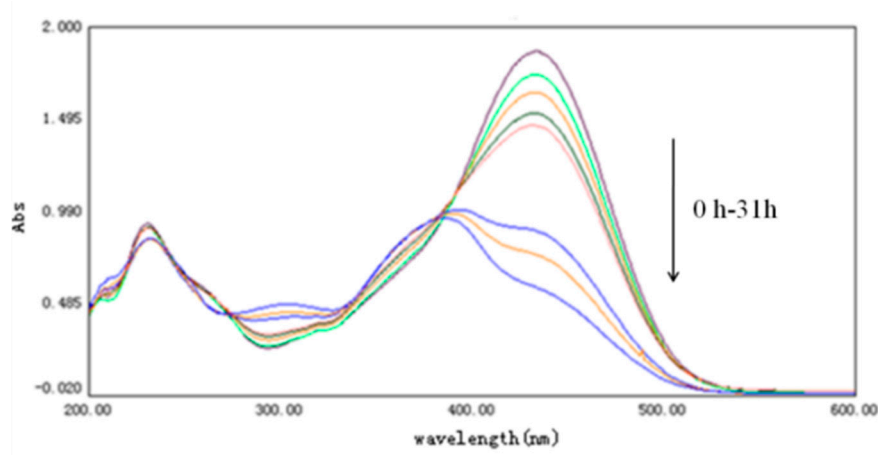

Figure S3. UV spectra of HSYA in alkaline solution in 0–3 h
